# Supplementary material for: The effect of riffle restoration on the recovery of endangered Nooksack Dace (Rhinichthys cataractae sp. cataractae)
Source: Atypon-hosted journal article supplement (doi:10.1139/facets-2023-0217), 2024-01-01
Supplement: facets-2023-0217suppla.pdf [file facets-2023-0217suppla.pdf]

## Supplementary Material

**Table S1.** Riffle Restoration Replicates in Bertrand Creek in Langley British Columbia, Canada.

| <b>Riffle Replicates</b> | <b>Treatment</b> | <b>Coordinates (UTM)</b> |
|--------------------------|------------------|--------------------------|
| Bertrand R0.5            | <b>Control</b>   | 10U 533910 5431214       |
| Bertrand R1              | Cobble           | 10U 533921 5431193       |
| Bertrand R2              | Cobble           | 10U 533948 5431174       |
| Bertrand R3              | <b>Control</b>   | 10U 534075 5431085       |
| Bertrand R3.5            | Cobble           | 10U 534078 5431066       |
| Bertrand R4              | Cobble           | 10U 534080 5431033       |
| Bertrand R6              | <b>Control</b>   | 10U 534139 5430994       |
| Bertrand R7              | <b>Control</b>   | 10U 534149 5430982       |

**Table S2.** Riffle Restoration Replicates in Pepin Creek in Langley British Columbia, Canada.

| <b>Riffle Replicates</b> | <b>Treatment</b> | <b>Coordinates (UTM)</b> |
|--------------------------|------------------|--------------------------|
| Pepin R3                 | Cobble           | 10U 539052 5428927       |
| Pepin R5                 | Cobble + Gravel  | 10U 538677 5428331       |
| Pepin R5.75              | Cobble           | 10U 538685 5428296       |
| Pepin R5.9               | Gravel           | 10U 538682 5428277       |
| Pepin R6                 | <b>Control</b>   | 10U 538680 5428255       |
| Pepin R7                 | Gravel           | 10U 538681 5428229       |
| Pepin R8                 | Cobble + Gravel  | 10U 538681 5428206       |
| Pepin R9                 | Cobble + Gravel  | 10U 538688 5428174       |
| Pepin R9.5               | Cobble           | 10U 538689 5428169       |
| Pepin R10                | Gravel           | 10U 538683 5428153       |
| Pepin R11                | Cobble           | 10U 538644 5428118       |
| Pepin R12                | <b>Control</b>   | 10U 538625 5428111       |
| Pepin R14                | <b>Control</b>   | 10U 538623 5427972       |

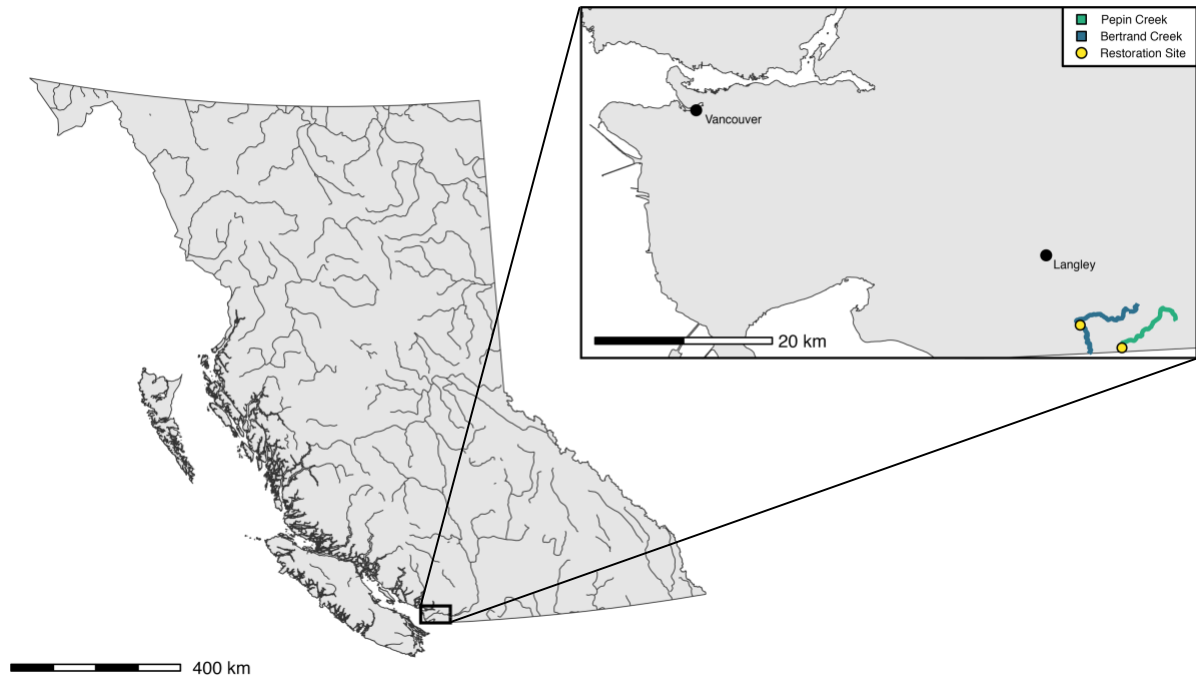

**Figure S1.** Map of British Columbia as well as the location of riffle restoration along Bertrand Creek (blue) and Pepin Creek (green).

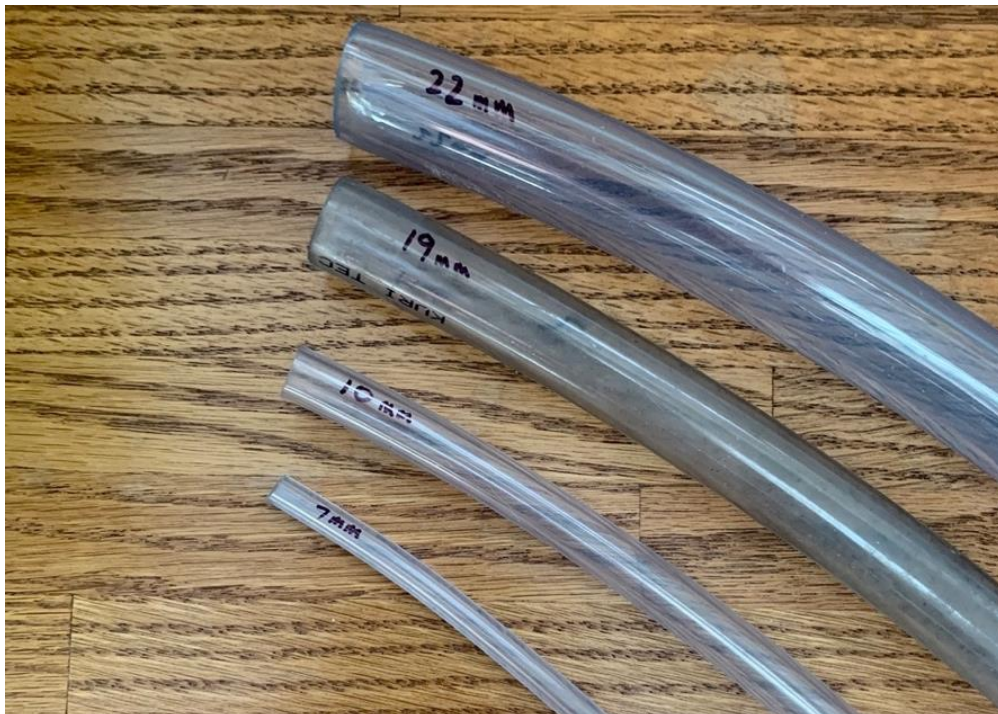

**Figure S2.** Plastic tubing used to measure the diameter and depth of interstitial refugia.

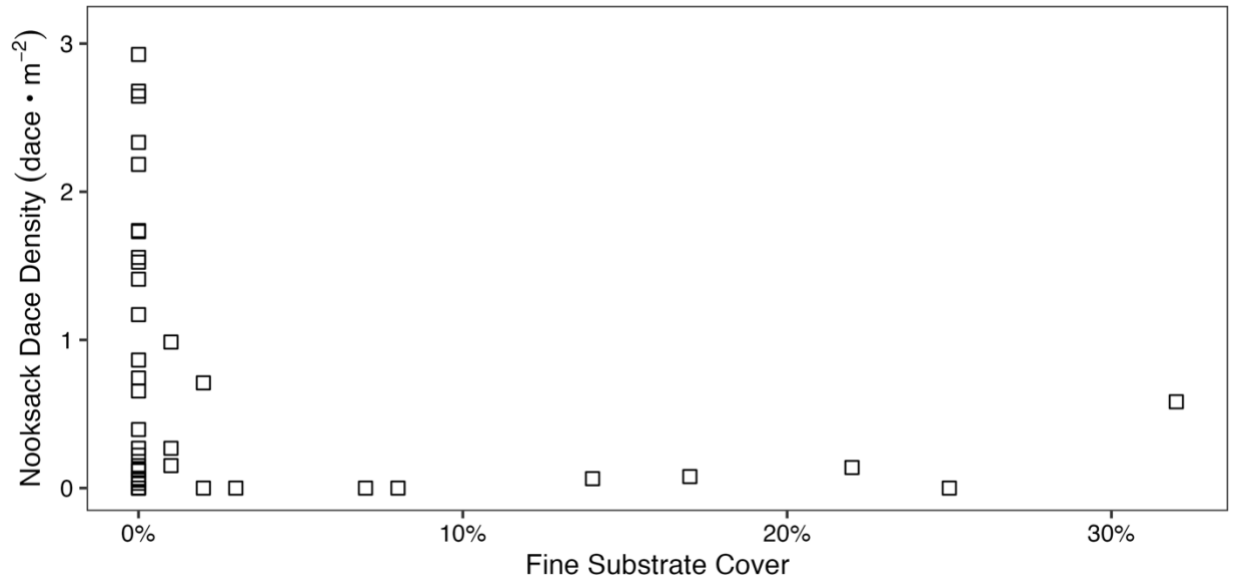

**Figure S3.** The effect of fine substrate cover (%) on dace abundance (dace • m<sup>2</sup>).

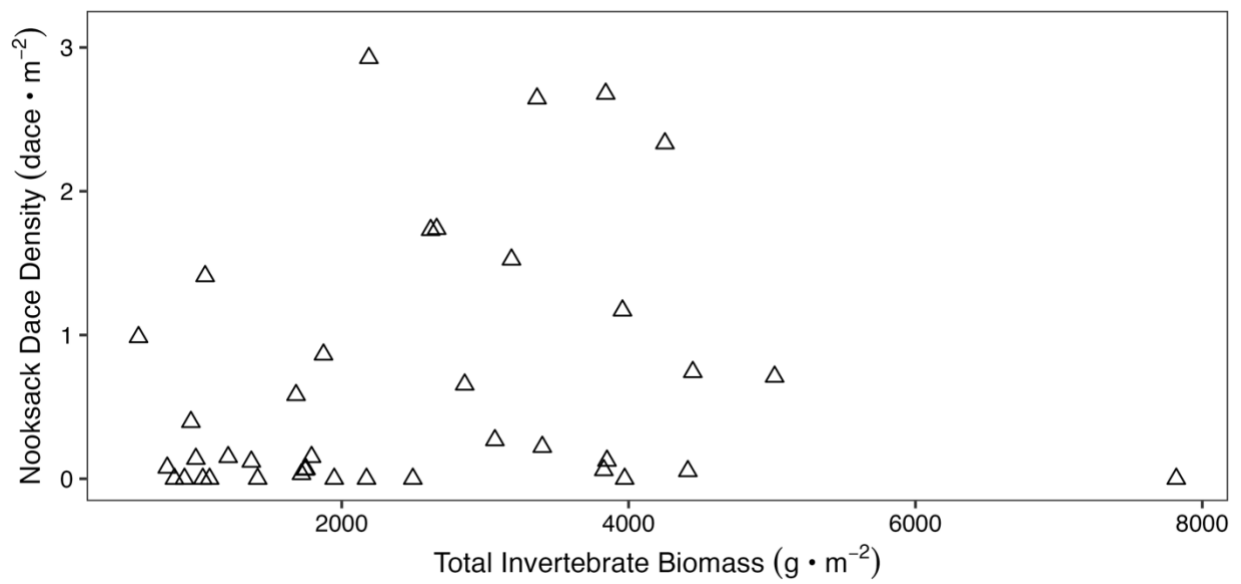

**Figure S4.** The effect of invertebrate prey biomass (mg • m<sup>2</sup>) on Nooksack dace abundance (dace • m<sup>2</sup>).

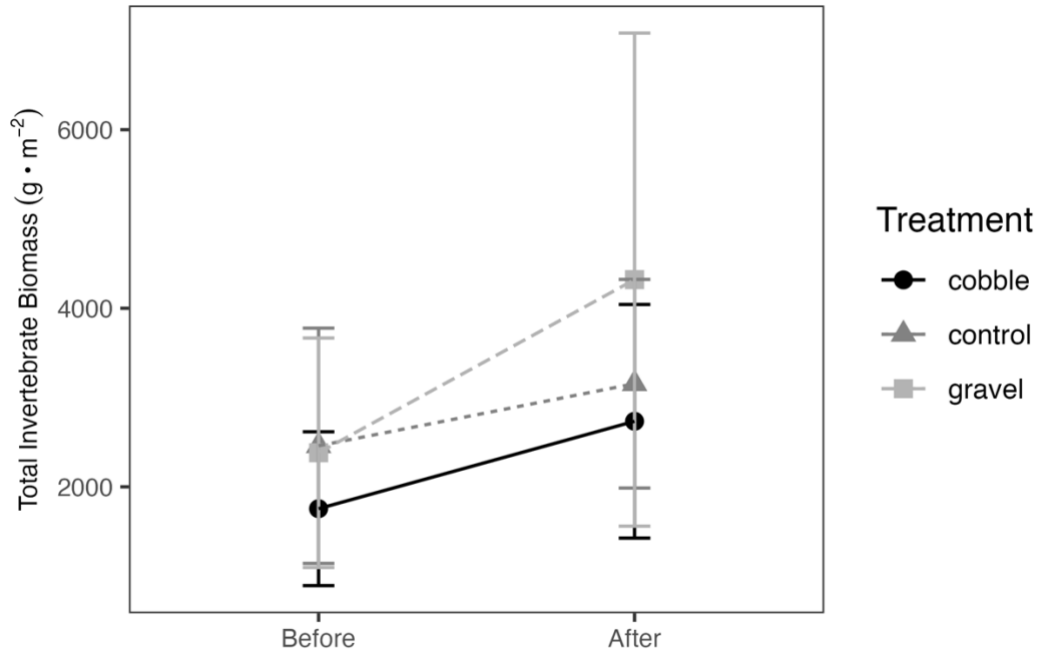

**Figure S5.** The change in invertebrate prey biomass ( $mg \cdot m^2$ ) within restoration treatments (mean  $\pm$  SD).
